# Supplementary material for: Patlak Slope versus Standardized Uptake Value Image Quality in an Oncologic PET/CT Population: A Prospective Cross-Sectional Study
Source: MDPI journal article supplement (doi:10.3390/diagnostics14090883), 2024-04-24
Supplement: s1 [file s1]

**Supplemental Table S1. Two-reader overall image quality assessments.**

| Variable 1<br>(V1)                                               | V1 Mean<br>(Min, Max) | Variable 2<br>(V2) | V2 Mean<br>(Min, Max) | P value (V1<br>vs. V2) | V1 > V2 | V1 = V2 | V1 < V2 | % agreement<br>(95% CI) |
|------------------------------------------------------------------|-----------------------|--------------------|-----------------------|------------------------|---------|---------|---------|-------------------------|
| <b>All tracers: scale 1-4 (1 = worst; 4 = best)</b>              |                       |                    |                       |                        |         |         |         |                         |
| <i>SUV-early</i>                                                 |                       | <i>PS-early</i>    |                       |                        |         |         |         |                         |
| R1                                                               | 3.88 (2, 4)           | R1                 | 1.19 (1, 2)           | <0.001                 | R1: 43  | R1: 0   | R1: 0   | 93.0                    |
| R2                                                               | 3.84 (3, 4)           | R2                 | 2.14 (1, 4)           | <0.001                 | R2: 40  | R2: 3   | R2: 0   | (80.9, 98.5)            |
| <i>SUV-late</i>                                                  |                       | <i>PS-late</i>     |                       |                        |         |         |         |                         |
| R1                                                               | 2.79 (1, 3)           | R1                 | 3.95 (3, 4)           | <0.001                 | R1: 0   | R1: 1   | R1: 42  | 32.6                    |
| R2                                                               | 3.44 (1, 4)           | R2                 | 3.95 (3, 4)           | 0.002                  | R2: 2   | R2: 26  | R2: 15  | (19.0, 48.5)            |
| <i>SUV-early</i>                                                 |                       | <i>SUV-late</i>    |                       |                        |         |         |         |                         |
| R1                                                               | 3.88 (2, 4)           | R1                 | 2.79 (1, 3)           | <0.001                 | R1: 41  | R1: 1   | R1: 1   | 32.6                    |
| R2                                                               | 3.84 (3, 4)           | R2                 | 3.44 (1, 4)           | 0.03                   | R2: 14  | R2: 23  | R2: 6   | (19.0, 48.5)            |
| <i>PS-early</i>                                                  |                       | <i>PS-late</i>     |                       |                        |         |         |         |                         |
| R1                                                               | 1.19 (1, 2)           | R1                 | 3.95 (3, 4)           | <0.001                 | R1: 0   | R1: 0   | R1: 43  | 90.7                    |
| R2                                                               | 2.14 (1, 4)           | R2                 | 3.95 (3, 4)           | <0.001                 | R2: 0   | R2: 3   | R2: 40  | (77.9, 97.4)            |
| <i>SUV-early</i>                                                 |                       | <i>PS-late</i>     |                       |                        |         |         |         |                         |
| R1                                                               | 3.88 (2, 4)           | R1                 | 3.95 (3, 4)           | N/A                    | R1: 1   | R1: 39  | R1: 3   | 81.4                    |
| R2                                                               | 3.84 (3, 4)           | R2                 | 3.95 (3, 4)           | >0.05*                 | R2: 2   | R2: 34  | R2: 7   | (66.6, 91.6)            |
| <i>PS-early</i>                                                  |                       | <i>SUV-late</i>    |                       |                        |         |         |         |                         |
| R1                                                               | 1.19 (1, 2)           | R1                 | 2.79 (1, 3)           | <0.001                 | R1: 0   | R1: 2   | R1: 41  | 81.4                    |
| R2                                                               | 2.14 (1, 4)           | R2                 | 3.44 (1, 4)           | <0.001                 | R2: 4   | R2: 3   | R2: 36  | (66.6, 91.6)            |
| <b>[<sup>18</sup>F]FDG only: scale 1-4 (1 = worst; 4 = best)</b> |                       |                    |                       |                        |         |         |         |                         |
| <i>SUV-early</i>                                                 |                       | <i>PS-early</i>    |                       |                        |         |         |         |                         |
| R1                                                               | 3.94 (3, 4)           | R1                 | 1.12 (1, 2)           | <0.001                 | R1: 33  | R1: 0   | R1: 0   | 100.0                   |
| R2                                                               | 3.82 (3, 4)           | R2                 | 1.94 (1, 3)           | <0.001                 | R2: 33  | R2: 0   | R2: 0   | (89.4, 100.0)           |
| <i>SUV-late</i>                                                  |                       | <i>PS-late</i>     |                       |                        |         |         |         |                         |
| R1                                                               | 2.91 (2, 3)           | R1                 | 3.97 (3, 4)           | <0.001                 | R1: 0   | R1: 1   | R1: 32  | 18.2                    |
| R2                                                               | 3.82 (3, 4)           | R2                 | 3.94 (3, 4)           | >0.05*                 | R2: 2   | R2: 25  | R2: 6   | (7.0, 35.4)             |
| <i>SUV-early</i>                                                 |                       | <i>SUV-late</i>    |                       |                        |         |         |         |                         |
| R1                                                               | 3.94 (3, 4)           | R1                 | 2.91 (2, 3)           | <0.001                 | R1: 32  | R1: 1   | R1: 0   | 18.2                    |
| R2                                                               | 3.82 (3, 4)           | R2                 | 3.82 (3, 4)           | >0.05*                 | R2: 6   | R2: 21  | R2: 6   | (7.0, 35.4)             |
| <i>PS-early</i>                                                  |                       | <i>PS-late</i>     |                       |                        |         |         |         |                         |
| R1                                                               | 1.12 (1, 2)           | R1                 | 3.97 (3, 4)           | <0.001                 | R1: 0   | R1: 0   | R1: 33  | 97.0                    |
| R2                                                               | 1.94 (1, 3)           | R2                 | 3.94 (3, 4)           | <0.001                 | R2: 0   | R2: 1   | R2: 32  | (84.2, 99.9)            |
| <i>SUV-early</i>                                                 |                       | <i>PS-late</i>     |                       |                        |         |         |         |                         |
| R1                                                               | 3.94 (3, 4)           | R1                 | 3.97 (3, 4)           | N/A                    | R1: 1   | R1: 30  | R1: 2   | 78.8                    |
| R2                                                               | 3.82 (3, 4)           | R2                 | 3.94 (3, 4)           | >0.05*                 | R2: 2   | R2: 25  | R2: 6   | (61.1, 91.0)            |
| <i>PS-early</i>                                                  |                       | <i>SUV-late</i>    |                       |                        |         |         |         |                         |
| R1                                                               | 1.12 (1, 2)           | R1                 | 2.91 (2, 3)           | <0.001                 | R1: 0   | R1: 0   | R1: 33  | 100.0                   |
| R2                                                               | 1.94 (1, 3)           | R2                 | 3.82 (3, 4)           | <0.001                 | R2: 0   | R2: 0   | R2: 33  | (89.4, 100.0)           |
| <b>DOTATATE only: scale of 1-4 (1 = worst; 4 = best)</b>         |                       |                    |                       |                        |         |         |         |                         |
| <i>SUV-early</i>                                                 |                       | <i>PS-early</i>    |                       |                        |         |         |         |                         |
| R1                                                               | 3.63 (2, 4)           | R1                 | 1.38 (1, 2)           | <0.05*                 | R1: 8   | R1: 0   | R1: 0   | 62.5                    |
| R2                                                               | 3.88 (3, 4)           | R2                 | 3.00 (1, 4)           | N/A                    | R2: 5   | R2: 3   | R2: 0   | (24.5, 91.5)            |
| <i>SUV-late</i>                                                  |                       | <i>PS-late</i>     |                       |                        |         |         |         |                         |
| R1                                                               | 2.25 (1, 3)           | R1                 | 3.88 (3, 4)           | <0.05*                 | R1: 0   | R1: 0   | R1: 8   | 87.5                    |
| R2                                                               | 2.00 (1, 4)           | R2                 | 4.00 (4, 4)           | <0.05*                 | R2: 0   | R2: 1   | R2: 7   | (47.3, 99.7)            |
| <i>SUV-early</i>                                                 |                       | <i>SUV-late</i>    |                       |                        |         |         |         |                         |
| R1                                                               | 3.63 (2, 4)           | R1                 | 2.25 (1, 3)           | <0.05*                 | R1: 7   | R1: 0   | R1: 1   | 75.0                    |
| R2                                                               | 3.88 (3, 4)           | R2                 | 2.00 (1, 4)           | <0.05*                 | R2: 6   | R2: 2   | R2: 0   | (34.9, 96.8)            |
| <i>PS-early</i>                                                  |                       | <i>PS-late</i>     |                       |                        |         |         |         |                         |
| R1                                                               | 1.38 (1, 2)           | R1                 | 3.88 (3, 4)           | <0.05*                 | R1: 0   | R1: 0   | R1: 8   | 75.0                    |
| R2                                                               | 3.00 (1, 4)           | R2                 | 4.00 (4, 4)           | <0.05*                 | R2: 0   | R2: 2   | R2: 6   | (34.9, 96.8)            |
| <i>SUV-early</i>                                                 |                       | <i>PS-late</i>     |                       |                        |         |         |         |                         |
| R1                                                               | 3.63 (2, 4)           | R1                 | 3.88 (3, 4)           | N/A                    | R1: 0   | R1: 7   | R1: 1   | 100.0                   |
| R2                                                               | 3.88 (3, 4)           | R2                 | 4.00 (4, 4)           | N/A                    | R2: 0   | R2: 7   | R2: 1   | (63.0, 100.0)           |
| <i>PS-early</i>                                                  |                       | <i>SUV-late</i>    |                       |                        |         |         |         |                         |
| R1                                                               | 1.38 (1, 2)           | R1                 | 2.25 (1, 3)           | <0.05*                 | R1: 0   | R1: 2   | R1: 6   | 12.5                    |
| R2                                                               | 3.00 (1, 4)           | R2                 | 2.00 (1, 4)           | N/A                    | R2: 4   | R2: 3   | R2: 1   | (0.3, 52.6)             |

**Abbreviations:** Max = maximum; Min = minimum; R1 = reader 1; R2 = reader 2

\* Insufficient *n* for precise *P* value calculation but still possible to determine statistical significance

N/A = insufficient cases with different values for V1 and V2 to calculate a *P* value

**Note.** – The V1 > V2, V1 = V2, and V1 < V2 columns indicate the number of case in which each reader assigned higher, equal, and lower scores to variable 1 relative to variable 2, respectively.

**Supplemental Table S2. Two-reader image noise assessments.**

| Variable 1 (V1)                                                  | V1 Mean (Min, Max) | Variable 2 (V2) | V2 Mean (Min, Max) | P value (V1 vs. V2) | V1 > V2 | V1 = V2 | V1 < V2 | % agreement (95% CI) |
|------------------------------------------------------------------|--------------------|-----------------|--------------------|---------------------|---------|---------|---------|----------------------|
| <b>All tracers: scale 1-4 (1 = worst; 4 = best)</b>              |                    |                 |                    |                     |         |         |         |                      |
| <i>SUV-early</i>                                                 |                    | <i>PS-early</i> |                    |                     |         |         |         |                      |
| R1                                                               | 3.86 (2, 4)        | R1              | 1.14 (1, 2)        | <0.001              | R1: 43  | R1: 0   | R1: 0   | 95.3                 |
| R2                                                               | 3.84 (2, 4)        | R2              | 1.74 (1, 4)        | <0.001              | R2: 41  | R2: 2   | R2: 0   | (84.1, 99.4)         |
| <i>SUV-late</i>                                                  |                    | <i>PS-late</i>  |                    |                     |         |         |         |                      |
| R1                                                               | 2.63 (1, 3)        | R1              | 3.95 (3, 4)        | <0.001              | R1: 0   | R1: 1   | R1: 42  | 60.5                 |
| R2                                                               | 3.14 (1, 4)        | R2              | 3.98 (3, 4)        | <0.001              | R2: 0   | R2: 17  | R2: 26  | (44.4, 75.0)         |
| <i>SUV-early</i>                                                 |                    | <i>SUV-late</i> |                    |                     |         |         |         |                      |
| R1                                                               | 3.86 (2, 4)        | R1              | 2.63 (1, 3)        | <0.001              | R1: 40  | R1: 3   | R1: 0   | 55.8                 |
| R2                                                               | 3.84 (2, 4)        | R2              | 3.14 (1, 4)        | <0.001              | R2: 26  | R2: 11  | R2: 6   | (39.9, 71.0)         |
| <i>PS-early</i>                                                  |                    | <i>PS-late</i>  |                    |                     |         |         |         |                      |
| R1                                                               | 1.14 (1, 2)        | R1              | 3.95 (3, 4)        | <0.001              | R1: 0   | R1: 0   | R1: 43  | 95.3                 |
| R2                                                               | 1.74 (1, 4)        | R2              | 3.98 (3, 4)        | <0.001              | R2: 0   | R2: 1   | R2: 42  | (84.1, 99.4)         |
| <i>SUV-early</i>                                                 |                    | <i>PS-late</i>  |                    |                     |         |         |         |                      |
| R1                                                               | 3.86 (2, 4)        | R1              | 3.95 (3, 4)        | N/A                 | R1: 1   | R1: 38  | R1: 4   | 79.1                 |
| R2                                                               | 3.84 (2, 4)        | R2              | 3.98 (3, 4)        | >0.05*              | R2: 1   | R2: 36  | R2: 6   | (64.0, 90.0)         |
| <i>PS-early</i>                                                  |                    | <i>SUV-late</i> |                    |                     |         |         |         |                      |
| R1                                                               | 1.14 (1, 2)        | R1              | 2.63 (1, 3)        | <0.001              | R1: 1   | R1: 4   | R1: 38  | 79.1                 |
| R2                                                               | 1.74 (1, 4)        | R2              | 3.14 (1, 4)        | <0.001              | R2: 4   | R2: 4   | R2: 35  | (64.0, 90.0)         |
| <b>[<sup>18</sup>F]FDG only: scale 1-4 (1 = worst; 4 = best)</b> |                    |                 |                    |                     |         |         |         |                      |
| <i>SUV-early</i>                                                 |                    | <i>PS-early</i> |                    |                     |         |         |         |                      |
| R1                                                               | 3.91 (3, 4)        | R1              | 1.03 (1, 2)        | <0.001              | R1: 33  | R1: 0   | R1: 0   | 100.0                |
| R2                                                               | 3.85 (3, 4)        | R2              | 1.58 (1, 3)        | <0.001              | R2: 33  | R2: 0   | R2: 0   | (89.4, 100.0)        |
| <i>SUV-late</i>                                                  |                    | <i>PS-late</i>  |                    |                     |         |         |         |                      |
| R1                                                               | 2.82 (2, 3)        | R1              | 3.97 (3, 4)        | <0.001              | R1: 0   | R1: 1   | R1: 32  | 54.5                 |
| R2                                                               | 3.45 (3, 4)        | R2              | 3.97 (3, 4)        | <0.001              | R2: 0   | R2: 16  | R2: 17  | (36.3, 71.9)         |
| <i>SUV-early</i>                                                 |                    | <i>SUV-late</i> |                    |                     |         |         |         |                      |
| R1                                                               | 3.91 (3, 4)        | R1              | 2.82 (2, 3)        | <0.001              | R1: 31  | R1: 2   | R1: 0   | 48.5                 |
| R2                                                               | 3.85 (3, 4)        | R2              | 3.45 (3, 4)        | 0.02                | R2: 18  | R2: 10  | R2: 5   | (31.0, 66.4)         |
| <i>PS-early</i>                                                  |                    | <i>PS-late</i>  |                    |                     |         |         |         |                      |
| R1                                                               | 1.03 (1, 2)        | R1              | 3.97 (3, 4)        | <0.001              | R1: 0   | R1: 0   | R1: 33  | 100.0                |
| R2                                                               | 1.58 (1, 3)        | R2              | 3.97 (3, 4)        | <0.001              | R2: 0   | R2: 0   | R2: 33  | (89.4, 100.0)        |
| <i>SUV-early</i>                                                 |                    | <i>PS-late</i>  |                    |                     |         |         |         |                      |
| R1                                                               | 3.91 (3, 4)        | R1              | 3.97 (3, 4)        | N/A                 | R1: 1   | R1: 29  | R1: 3   | 75.8                 |
| R2                                                               | 3.85 (3, 4)        | R2              | 3.97 (3, 4)        | >0.05*              | R2: 1   | R2: 27  | R2: 5   | (57.8, 89.0)         |
| <i>PS-early</i>                                                  |                    | <i>SUV-late</i> |                    |                     |         |         |         |                      |
| R1                                                               | 1.03 (1, 2)        | R1              | 2.82 (2, 3)        | <0.001              | R1: 0   | R1: 0   | R1: 33  | 94.0                 |
| R2                                                               | 1.58 (1, 3)        | R2              | 3.45 (3, 4)        | <0.001              | R2: 0   | R2: 2   | R2: 31  | (79.8, 99.2)         |
| <b>DOTATATE only: scale of 1-4 (1 = worst; 4 = best)</b>         |                    |                 |                    |                     |         |         |         |                      |
| <i>SUV-early</i>                                                 |                    | <i>PS-early</i> |                    |                     |         |         |         |                      |
| R1                                                               | 3.63 (2, 4)        | R1              | 1.50 (1, 2)        | <0.05*              | R1: 8   | R1: 0   | R1: 0   | 75.0                 |
| R2                                                               | 3.75 (2, 4)        | R2              | 2.63 (1, 4)        | <0.05*              | R2: 6   | R2: 2   | R2: 0   | (34.9, 96.8)         |
| <i>SUV-late</i>                                                  |                    | <i>PS-late</i>  |                    |                     |         |         |         |                      |
| R1                                                               | 1.75 (1, 2)        | R1              | 3.88 (3, 4)        | <0.05*              | R1: 0   | R1: 0   | R1: 8   | 87.5                 |
| R2                                                               | 2.00 (1, 4)        | R2              | 4.00 (4, 4)        | <0.05*              | R2: 0   | R2: 1   | R2: 7   | (47.3, 99.7)         |
| <i>SUV-early</i>                                                 |                    | <i>SUV-late</i> |                    |                     |         |         |         |                      |
| R1                                                               | 3.63 (2, 4)        | R1              | 1.75 (1, 2)        | <0.05*              | R1: 7   | R1: 1   | R1: 0   | 75.0                 |
| R2                                                               | 3.75 (2, 4)        | R2              | 2.00 (1, 4)        | <0.05*              | R2: 6   | R2: 1   | R2: 1   | (34.9, 96.8)         |
| <i>PS-early</i>                                                  |                    | <i>PS-late</i>  |                    |                     |         |         |         |                      |
| R1                                                               | 1.50 (1, 2)        | R1              | 3.88 (3, 4)        | <0.05*              | R1: 0   | R1: 0   | R1: 8   | 87.5                 |
| R2                                                               | 2.63 (1, 4)        | R2              | 4.00 (4, 4)        | <0.05*              | R2: 0   | R2: 1   | R2: 7   | (47.3, 99.7)         |
| <i>SUV-early</i>                                                 |                    | <i>PS-late</i>  |                    |                     |         |         |         |                      |
| R1                                                               | 3.63 (2, 4)        | R1              | 3.88 (3, 4)        | N/A                 | R1: 0   | R1: 7   | R1: 1   | 100.0                |
| R2                                                               | 3.75 (2, 4)        | R2              | 4.00 (4, 4)        | N/A                 | R2: 0   | R2: 7   | R2: 1   | (63.0, 100.0)        |
| <i>PS-early</i>                                                  |                    | <i>SUV-late</i> |                    |                     |         |         |         |                      |
| R1                                                               | 1.50 (1, 2)        | R1              | 1.75 (1, 2)        | N/A                 | R1: 1   | R1: 4   | R1: 3   | 25.0                 |
| R2                                                               | 2.63 (1, 4)        | R2              | 2.00 (1, 4)        | >0.05*              | R2: 4   | R2: 2   | R2: 2   | (3.2, 65.0)          |

**Abbreviations:** Max = maximum; Min = minimum; R1 = reader 1; R2 = reader 2

\* Insufficient *n* for precise *P* value calculation but still possible to determine statistical significance

N/A = insufficient cases with different values for V1 and V2 to calculate a *P* value

**Note.** – The V1 > V2, V1 = V2, and V1 < V2 columns indicate the number of case in which each reader assigned higher, equal, and lower scores to variable 1 relative to variable 2, respectively.

**Supplemental Table S3. Two-reader artifact freeness assessments.**

| Variable 1<br>(V1)                                               | V1 Mean<br>(Min, Max) | Variable 2<br>(V2) | V2 Mean<br>(Min, Max) | P value (V1<br>vs. V2) | V1 > V2 | V1 = V2 | V1 < V2 | % agreement<br>(95% CI) |
|------------------------------------------------------------------|-----------------------|--------------------|-----------------------|------------------------|---------|---------|---------|-------------------------|
| <b>All tracers: scale 1-4 (1 = worst; 4 = best)</b>              |                       |                    |                       |                        |         |         |         |                         |
| <i>SUV-early</i>                                                 |                       | <i>PS-early</i>    |                       |                        |         |         |         |                         |
| R1                                                               | 3.95 (3, 4)           | R1                 | 1.14 (1, 2)           | <0.001                 | R1: 43  | R1: 0   | R1: 0   | 86.0                    |
| R2                                                               | 3.60 (1, 4)           | R2                 | 1.77 (1, 4)           | <0.001                 | R2: 37  | R2: 6   | R2: 0   | (72.0, 94.7)            |
| <i>SUV-late</i>                                                  |                       | <i>PS-late</i>     |                       |                        |         |         |         |                         |
| R1                                                               | 2.84 (1, 4)           | R1                 | 3.95 (3, 4)           | <0.001                 | R1: 0   | R1: 2   | R1: 41  | 34.9                    |
| R2                                                               | 3.44 (1, 4)           | R2                 | 3.98 (3, 4)           | 0.001                  | R2: 1   | R2: 27  | R2: 15  | (21.0, 50.1)            |
| <i>SUV-early</i>                                                 |                       | <i>SUV-late</i>    |                       |                        |         |         |         |                         |
| R1                                                               | 3.95 (3, 4)           | R1                 | 2.84 (1, 4)           | <0.001                 | R1: 42  | R1: 1   | R1: 0   | 34.9                    |
| R2                                                               | 3.60 (1, 4)           | R2                 | 3.44 (1, 4)           | >0.05*                 | R2: 14  | R2: 18  | R2: 11  | (21.0, 50.1)            |
| <i>PS-early</i>                                                  |                       | <i>PS-late</i>     |                       |                        |         |         |         |                         |
| R1                                                               | 1.14 (1, 2)           | R1                 | 3.95 (3, 4)           | <0.001                 | R1: 0   | R1: 0   | R1: 43  | 93.0                    |
| R2                                                               | 1.77 (1, 4)           | R2                 | 3.98 (3, 4)           | <0.001                 | R2: 0   | R2: 2   | R2: 41  | (80.9, 98.5)            |
| <i>SUV-early</i>                                                 |                       | <i>PS-late</i>     |                       |                        |         |         |         |                         |
| R1                                                               | 3.95 (3, 4)           | R1                 | 3.95 (3, 4)           | N/A                    | R1: 1   | R1: 41  | R1: 1   | 72.1                    |
| R2                                                               | 3.60 (1, 4)           | R2                 | 3.98 (3, 4)           | 0.005                  | R2: 1   | R2: 30  | R2: 12  | (56.3, 84.7)            |
| <i>PS-early</i>                                                  |                       | <i>SUV-late</i>    |                       |                        |         |         |         |                         |
| R1                                                               | 1.14 (1, 2)           | R1                 | 2.84 (1, 4)           | <0.001                 | R1: 0   | R1: 5   | R1: 38  | 83.7                    |
| R2                                                               | 1.77 (1, 4)           | R2                 | 3.44 (1, 4)           | <0.001                 | R2: 4   | R2: 3   | R2: 36  | (69.3, 93.1)            |
| <b>[<sup>18</sup>F]FDG only: scale 1-4 (1 = worst; 4 = best)</b> |                       |                    |                       |                        |         |         |         |                         |
| <i>SUV-early</i>                                                 |                       | <i>PS-early</i>    |                       |                        |         |         |         |                         |
| R1                                                               | 4.00 (4, 4)           | R1                 | 1.03 (1, 2)           | <0.001                 | R1: 33  | R1: 0   | R1: 0   | 87.9                    |
| R2                                                               | 3.52 (1, 4)           | R2                 | 1.58 (1, 3)           | <0.001                 | R2: 29  | R2: 4   | R2: 0   | (71.8, 96.6)            |
| <i>SUV-late</i>                                                  |                       | <i>PS-late</i>     |                       |                        |         |         |         |                         |
| R1                                                               | 3.03 (3, 4)           | R1                 | 3.97 (3, 4)           | <0.001                 | R1: 0   | R1: 2   | R1: 31  | 21.2                    |
| R2                                                               | 3.82 (3, 4)           | R2                 | 3.97 (3, 4)           | >0.05*                 | R2: 1   | R2: 26  | R2: 6   | (9.0, 39.0)             |
| <i>SUV-early</i>                                                 |                       | <i>SUV-late</i>    |                       |                        |         |         |         |                         |
| R1                                                               | 4.00 (4, 4)           | R1                 | 3.03 (3, 4)           | <0.001                 | R1: 32  | R1: 1   | R1: 0   | 21.2                    |
| R2                                                               | 3.52 (1, 4)           | R2                 | 3.82 (3, 4)           | 0.10                   | R2: 6   | R2: 16  | R2: 11  | (9.0, 39.0)             |
| <i>PS-early</i>                                                  |                       | <i>PS-late</i>     |                       |                        |         |         |         |                         |
| R1                                                               | 1.03 (1, 2)           | R1                 | 3.97 (3, 4)           | <0.001                 | R1: 0   | R1: 0   | R1: 33  | 97.0                    |
| R2                                                               | 1.58 (1, 3)           | R2                 | 3.97 (3, 4)           | <0.001                 | R2: 0   | R2: 1   | R2: 32  | (84.2, 99.9)            |
| <i>SUV-early</i>                                                 |                       | <i>PS-late</i>     |                       |                        |         |         |         |                         |
| R1                                                               | 4.00 (4, 4)           | R1                 | 3.97 (3, 4)           | N/A                    | R1: 1   | R1: 32  | R1: 0   | 66.7                    |
| R2                                                               | 3.52 (1, 4)           | R2                 | 3.97 (3, 4)           | 0.006                  | R2: 1   | R2: 21  | R2: 11  | (48.1, 82.0)            |
| <i>PS-early</i>                                                  |                       | <i>SUV-late</i>    |                       |                        |         |         |         |                         |
| R1                                                               | 1.03 (1, 2)           | R1                 | 3.03 (3, 4)           | <0.001                 | R1: 0   | R1: 0   | R1: 33  | 100.0                   |
| R2                                                               | 1.58 (1, 3)           | R2                 | 3.82 (3, 4)           | <0.001                 | R2: 0   | R2: 0   | R2: 33  | (89.4, 100.0)           |
| <b>DOTATATE only: scale of 1-4 (1 = worst; 4 = best)</b>         |                       |                    |                       |                        |         |         |         |                         |
| <i>SUV-early</i>                                                 |                       | <i>PS-early</i>    |                       |                        |         |         |         |                         |
| R1                                                               | 3.75 (3, 4)           | R1                 | 1.63 (1, 2)           | <0.05*                 | R1: 8   | R1: 0   | R1: 0   | 75.0                    |
| R2                                                               | 3.88 (3, 4)           | R2                 | 2.75 (1, 4)           | <0.05*                 | R2: 6   | R2: 2   | R2: 0   | (34.9, 96.8)            |
| <i>SUV-late</i>                                                  |                       | <i>PS-late</i>     |                       |                        |         |         |         |                         |
| R1                                                               | 2.00 (1, 3)           | R1                 | 3.88 (3, 4)           | <0.05*                 | R1: 0   | R1: 0   | R1: 8   | 87.5                    |
| R2                                                               | 2.00 (1, 4)           | R2                 | 4.00 (4, 4)           | <0.05*                 | R2: 0   | R2: 1   | R2: 7   | (47.3, 99.7)            |
| <i>SUV-early</i>                                                 |                       | <i>SUV-late</i>    |                       |                        |         |         |         |                         |
| R1                                                               | 3.75 (3, 4)           | R1                 | 2.00 (1, 3)           | <0.05*                 | R1: 8   | R1: 0   | R1: 0   | 75.0                    |
| R2                                                               | 3.88 (3, 4)           | R2                 | 2.00 (1, 4)           | <0.05*                 | R2: 6   | R2: 2   | R2: 0   | (34.9, 96.8)            |
| <i>PS-early</i>                                                  |                       | <i>PS-late</i>     |                       |                        |         |         |         |                         |
| R1                                                               | 1.63 (1, 2)           | R1                 | 3.88 (3, 4)           | <0.05*                 | R1: 0   | R1: 0   | R1: 8   | 87.5                    |
| R2                                                               | 2.75 (1, 4)           | R2                 | 4.00 (4, 4)           | <0.05*                 | R2: 0   | R2: 1   | R2: 7   | (47.3, 99.7)            |
| <i>SUV-early</i>                                                 |                       | <i>PS-late</i>     |                       |                        |         |         |         |                         |
| R1                                                               | 3.75 (3, 4)           | R1                 | 3.88 (3, 4)           | N/A                    | R1: 0   | R1: 7   | R1: 1   | 100.0                   |
| R2                                                               | 3.88 (3, 4)           | R2                 | 4.00 (4, 4)           | N/A                    | R2: 0   | R2: 7   | R2: 1   | (63.0, 100.0)           |
| <i>PS-early</i>                                                  |                       | <i>SUV-late</i>    |                       |                        |         |         |         |                         |
| R1                                                               | 1.63 (1, 2)           | R1                 | 2.00 (1, 3)           | N/A                    | R1: 0   | R1: 5   | R1: 3   | 25.0                    |
| R2                                                               | 2.75 (1, 4)           | R2                 | 2.00 (1, 4)           | N/A                    | R2: 4   | R2: 3   | R2: 1   | (3.19, 65.0)            |

**Abbreviations:** Max = maximum; Min = minimum; R1 = reader 1; R2 = reader 2

\* Insufficient *n* for precise *P* value calculation but still possible to determine statistical significance

N/A = insufficient cases with different values for V1 and V2 to calculate a *P* value

**Note.** – The V1 > V2, V1 = V2, and V1 < V2 columns indicate the number of case in which each reader assigned higher, equal, and lower scores to variable 1 relative to variable 2, respectively.

**Supplemental Table S4. Two-reader lesion conspicuity assessments.**

| Variable 1 (V1)                                                  | V1 Mean (Min, Max) | Variable 2 (V2) | V2 Mean (Min, Max) | P value (V1 vs. V2) | V1 > V2 | V1 = V2 | V1 < V2 | % agreement (95% CI) |
|------------------------------------------------------------------|--------------------|-----------------|--------------------|---------------------|---------|---------|---------|----------------------|
| <b>All tracers: scale 1-4 (1 = worst; 4 = best)</b>              |                    |                 |                    |                     |         |         |         |                      |
| <i>SUV-early</i>                                                 |                    | <i>PS-early</i> |                    |                     |         |         |         |                      |
| R1                                                               | 2.84 (2, 4)        | R1              | 2.28 (1, 4)        | 0.003               | R1: 23  | R1: 15  | R1: 5   | 44.2                 |
| R2                                                               | 3.28 (1, 4)        | R2              | 2.30 (1, 4)        | <0.001              | R2: 27  | R2: 12  | R2: 4   | (29.1, 60.1)         |
| <i>SUV-late</i>                                                  |                    | <i>PS-late</i>  |                    |                     |         |         |         |                      |
| R1                                                               | 3.53 (1, 4)        | R1              | 3.49 (2, 4)        | 0.84                | R1: 15  | R1: 17  | R1: 11  | 39.5                 |
| R2                                                               | 3.58 (1, 4)        | R2              | 3.77 (1, 4)        | >0.05*              | R2: 5   | R2: 29  | R2: 9   | (25.0, 55.6)         |
| <i>SUV-early</i>                                                 |                    | <i>SUV-late</i> |                    |                     |         |         |         |                      |
| R1                                                               | 2.84 (2, 4)        | R1              | 3.53 (1, 4)        | <0.001              | R1: 6   | R1: 9   | R1: 28  | 58.1                 |
| R2                                                               | 3.28 (1, 4)        | R2              | 3.58 (1, 4)        | >0.05*              | R2: 9   | R2: 18  | R2: 16  | (42.1, 73.0)         |
| <i>PS-early</i>                                                  |                    | <i>PS-late</i>  |                    |                     |         |         |         |                      |
| R1                                                               | 2.28 (1, 4)        | R1              | 3.49 (2, 4)        | <0.001              | R1: 4   | R1: 5   | R1: 34  | 69.8                 |
| R2                                                               | 2.30 (1, 4)        | R2              | 3.77 (1, 4)        | <0.001              | R2: 2   | R2: 7   | R2: 34  | (53.9, 82.8)         |
| <i>SUV-early</i>                                                 |                    | <i>PS-late</i>  |                    |                     |         |         |         |                      |
| R1                                                               | 2.84 (2, 4)        | R1              | 3.49 (2, 4)        | <0.001              | R1: 7   | R1: 9   | R1: 27  | 41.9                 |
| R2                                                               | 3.28 (1, 4)        | R2              | 3.77 (1, 4)        | 0.006               | R2: 2   | R2: 25  | R2: 16  | (27.0, 57.9)         |
| <i>PS-early</i>                                                  |                    | <i>SUV-late</i> |                    |                     |         |         |         |                      |
| R1                                                               | 2.28 (1, 4)        | R1              | 3.53 (1, 4)        | <0.001              | R1: 4   | R1: 7   | R1: 32  | 65.1                 |
| R2                                                               | 2.30 (1, 4)        | R2              | 3.58 (1, 4)        | <0.001              | R2: 4   | R2: 8   | R2: 31  | (49.1, 79.0)         |
| <b>[<sup>18</sup>F]FDG only: scale 1-4 (1 = worst; 4 = best)</b> |                    |                 |                    |                     |         |         |         |                      |
| <i>SUV-early</i>                                                 |                    | <i>PS-early</i> |                    |                     |         |         |         |                      |
| R1                                                               | 2.64 (2, 4)        | R1              | 2.12 (1, 4)        | 0.02                | R1: 16  | R1: 13  | R1: 4   | 39.4                 |
| R2                                                               | 3.09 (1, 4)        | R2              | 2.15 (1, 4)        | <0.001              | R2: 20  | R2: 9   | R2: 4   | (23.0, 57.9)         |
| <i>SUV-late</i>                                                  |                    | <i>PS-late</i>  |                    |                     |         |         |         |                      |
| R1                                                               | 3.73 (3, 4)        | R1              | 3.58 (2, 4)        | 0.32                | R1: 11  | R1: 15  | R1: 7   | 33.3                 |
| R2                                                               | 3.88 (2, 4)        | R2              | 3.73 (1, 4)        | >0.05*              | R2: 5   | R2: 26  | R2: 2   | (18.0, 51.8)         |
| <i>SUV-early</i>                                                 |                    | <i>SUV-late</i> |                    |                     |         |         |         |                      |
| R1                                                               | 2.64 (2, 4)        | R1              | 3.73 (3, 4)        | <0.001              | R1: 1   | R1: 5   | R1: 27  | 51.5                 |
| R2                                                               | 3.09 (1, 4)        | R2              | 3.88 (2, 4)        | 0.001               | R2: 2   | R2: 15  | R2: 16  | (33.5, 69.2)         |
| <i>PS-early</i>                                                  |                    | <i>PS-late</i>  |                    |                     |         |         |         |                      |
| R1                                                               | 2.12 (1, 4)        | R1              | 3.58 (2, 4)        | <0.001              | R1: 2   | R1: 2   | R1: 29  | 69.7                 |
| R2                                                               | 2.15 (1, 4)        | R2              | 3.73 (1, 4)        | <0.001              | R2: 2   | R2: 4   | R2: 27  | (51.2, 84.4)         |
| <i>SUV-early</i>                                                 |                    | <i>PS-late</i>  |                    |                     |         |         |         |                      |
| R1                                                               | 2.64 (2, 4)        | R1              | 3.58 (2, 4)        | <0.001              | R1: 1   | R1: 8   | R1: 24  | 48.5                 |
| R2                                                               | 3.09 (1, 4)        | R2              | 3.73 (1, 4)        | 0.006               | R2: 2   | R2: 15  | R2: 16  | (30.8, 66.4)         |
| <i>PS-early</i>                                                  |                    | <i>SUV-late</i> |                    |                     |         |         |         |                      |
| R1                                                               | 2.12 (1, 4)        | R1              | 3.73 (3, 4)        | <0.001              | R1: 1   | R1: 4   | R1: 28  | 69.7                 |
| R2                                                               | 2.15 (1, 4)        | R2              | 3.88 (2, 4)        | <0.001              | R2: 0   | R2: 5   | R2: 28  | (51.2, 84.4)         |
| <b>DOTATATE only: scale of 1-4 (1 = worst; 4 = best)</b>         |                    |                 |                    |                     |         |         |         |                      |
| <i>SUV-early</i>                                                 |                    | <i>PS-early</i> |                    |                     |         |         |         |                      |
| R1                                                               | 3.50 (2, 4)        | R1              | 3.00 (2, 4)        | >0.05*              | R1: 5   | R1: 2   | R1: 1   | 50.0                 |
| R2                                                               | 3.88 (3, 4)        | R2              | 3.13 (2, 4)        | N/A                 | R2: 5   | R2: 3   | R2: 0   | (15.7, 84.3)         |
| <i>SUV-late</i>                                                  |                    | <i>PS-late</i>  |                    |                     |         |         |         |                      |
| R1                                                               | 2.63 (1, 4)        | R1              | 3.38 (2, 4)        | >0.05*              | R1: 2   | R1: 2   | R1: 4   | 62.5                 |
| R2                                                               | 2.38 (1, 4)        | R2              | 3.88 (3, 4)        | <0.05*              | R2: 0   | R2: 2   | R2: 6   | (24.5, 91.5)         |
| <i>SUV-early</i>                                                 |                    | <i>SUV-late</i> |                    |                     |         |         |         |                      |
| R1                                                               | 3.50 (2, 4)        | R1              | 2.63 (1, 4)        | N/A                 | R1: 5   | R1: 3   | R1: 0   | 87.5                 |
| R2                                                               | 3.88 (3, 4)        | R2              | 2.38 (1, 4)        | <0.05*              | R2: 6   | R2: 2   | R2: 0   | (47.3, 99.7)         |
| <i>PS-early</i>                                                  |                    | <i>PS-late</i>  |                    |                     |         |         |         |                      |
| R1                                                               | 3.00 (2, 4)        | R1              | 3.38 (2, 4)        | >0.05*              | R1: 2   | R1: 2   | R1: 4   | 75.0                 |
| R2                                                               | 3.13 (2, 4)        | R2              | 3.88 (3, 4)        | N/A                 | R2: 0   | R2: 3   | R2: 5   | (34.9, 96.8)         |
| <i>SUV-early</i>                                                 |                    | <i>PS-late</i>  |                    |                     |         |         |         |                      |
| R1                                                               | 3.50 (2, 4)        | R1              | 3.38 (2, 4)        | >0.05*              | R1: 4   | R1: 1   | R1: 3   | 12.5                 |
| R2                                                               | 3.88 (3, 4)        | R2              | 3.88 (3, 4)        | N/A                 | R2: 0   | R2: 8   | R2: 0   | (0.3, 52.6)          |
| <i>PS-early</i>                                                  |                    | <i>SUV-late</i> |                    |                     |         |         |         |                      |
| R1                                                               | 3.00 (2, 4)        | R1              | 2.63 (1, 4)        | N/A                 | R1: 3   | R1: 3   | R1: 2   | 50.0                 |
| R2                                                               | 3.13 (2, 4)        | R2              | 2.38 (1, 4)        | N/A                 | R2: 4   | R2: 3   | R2: 1   | (15.7, 84.3)         |

**Abbreviations:** Max = maximum; Min = minimum; R1 = reader 1; R2 = reader 2

\* Insufficient *n* for precise *P* value calculation but still possible to determine statistical significance

N/A = insufficient cases with different values for V1 and V2 to calculate a *P* value

**Note.** – The V1 > V2, V1 = V2, and V1 < V2 columns indicate the number of case in which each reader assigned higher, equal, and lower scores to variable 1 relative to variable 2, respectively.

**Supplemental Table S5. Two-reader relative lesion number assessments.**

| Variable 1<br>(V1)                                               | V1 Mean<br>(Min, Max) | Variable 2<br>(V2) | V2 Mean<br>(Min, Max) | P value (V1<br>vs. V2) | V1 > V2 | V1 = V2 | V1 < V2 | % agreement<br>(95% CI) |
|------------------------------------------------------------------|-----------------------|--------------------|-----------------------|------------------------|---------|---------|---------|-------------------------|
| <b>All tracers: scale 1-4 (1 = worst; 4 = best)</b>              |                       |                    |                       |                        |         |         |         |                         |
| <i>SUV-early</i>                                                 |                       | <i>PS-early</i>    |                       |                        |         |         |         |                         |
| R1                                                               | 0.77 (0, 10)          | R1                 | 0.23 (0, 2)           | 0.10                   | R1: 10  | R1: 27  | R1: 6   | 58.1                    |
| R2                                                               | 0.58 (0, 8)           | R2                 | 0.12 (0, 3)           | 0.02                   | R2: 10  | R2: 31  | R2: 2   | (42.1, 73.0)            |
| <i>SUV-late</i>                                                  |                       | <i>PS-late</i>     |                       |                        |         |         |         |                         |
| R1                                                               | 2.09 (0, 25)          | R1                 | 1.35 (0, 11)          | 0.04                   | R1: 10  | R1: 30  | R1: 3   | 65.1                    |
| R2                                                               | 1.12 (0, 8)           | R2                 | 1.05 (0, 7)           | N/A                    | R2: 2   | R2: 38  | R2: 3   | (49.1, 79.0)            |
| <i>SUV-early</i>                                                 |                       | <i>SUV-late</i>    |                       |                        |         |         |         |                         |
| R1                                                               | 0.77 (0, 10)          | R1                 | 2.09 (0, 25)          | <0.001                 | R1: 4   | R1: 21  | R1: 18  | 65.1                    |
| R2                                                               | 0.58 (0, 8)           | R2                 | 1.12 (0, 8)           | 0.04                   | R2: 2   | R2: 28  | R2: 13  | (49.1, 79.0)            |
| <i>PS-early</i>                                                  |                       | <i>PS-late</i>     |                       |                        |         |         |         |                         |
| R1                                                               | 0.23 (0, 2)           | R1                 | 1.35 (0, 11)          | <0.001                 | R1: 2   | R1: 22  | R1: 19  | 65.1                    |
| R2                                                               | 0.12 (0, 3)           | R2                 | 1.05 (0, 7)           | <0.001                 | R2: 0   | R2: 26  | R2: 17  | (49.1, 79.0)            |
| <i>SUV-early</i>                                                 |                       | <i>PS-late</i>     |                       |                        |         |         |         |                         |
| R1                                                               | 0.77 (0, 10)          | R1                 | 1.35 (0, 11)          | 0.006                  | R1: 2   | R1: 27  | R1: 14  | 65.1                    |
| R2                                                               | 0.58 (0, 8)           | R2                 | 1.05 (0, 7)           | 0.02                   | R2: 1   | R2: 29  | R2: 13  | (49.1, 79.0)            |
| <i>PS-early</i>                                                  |                       | <i>SUV-late</i>    |                       |                        |         |         |         |                         |
| R1                                                               | 0.23 (0, 2)           | R1                 | 2.09 (0, 25)          | <0.001                 | R1: 2   | R1: 21  | R1: 20  | 65.1                    |
| R2                                                               | 0.12 (0, 3)           | R2                 | 1.12 (0, 8)           | 0.001                  | R2: 2   | R2: 23  | R2: 18  | (49.1, 79.0)            |
| <b>[<sup>18</sup>F]FDG only: scale 1-4 (1 = worst; 4 = best)</b> |                       |                    |                       |                        |         |         |         |                         |
| <i>SUV-early</i>                                                 |                       | <i>PS-early</i>    |                       |                        |         |         |         |                         |
| R1                                                               | 0.64 (0, 10)          | R1                 | 0.24 (0, 2)           | 0.48                   | R1: 6   | R1: 21  | R1: 6   | 57.6                    |
| R2                                                               | 0.58 (0, 8)           | R2                 | 0.06 (0, 1)           | 0.04                   | R2: 9   | R2: 22  | R2: 2   | (39.2, 74.5)            |
| <i>SUV-late</i>                                                  |                       | <i>PS-late</i>     |                       |                        |         |         |         |                         |
| R1                                                               | 2.42 (0, 25)          | R1                 | 1.45 (0, 11)          | <0.05*                 | R1: 7   | R1: 26  | R1: 0   | 69.7                    |
| R2                                                               | 1.42 (0, 8)           | R2                 | 1.15 (0, 7)           | N/A                    | R2: 2   | R2: 30  | R2: 1   | (51.2, 84.4)            |
| <i>SUV-early</i>                                                 |                       | <i>SUV-late</i>    |                       |                        |         |         |         |                         |
| R1                                                               | 0.64 (0, 10)          | R1                 | 2.42 (0, 25)          | <0.001                 | R1: 0   | R1: 16  | R1: 17  | 72.7                    |
| R2                                                               | 0.58 (0, 8)           | R2                 | 1.42 (0, 8)           | 0.002                  | R2: 0   | R2: 21  | R2: 12  | (54.5, 86.7)            |
| <i>PS-early</i>                                                  |                       | <i>PS-late</i>     |                       |                        |         |         |         |                         |
| R1                                                               | 0.24 (0, 2)           | R1                 | 1.45 (0, 11)          | 0.001                  | R1: 2   | R1: 15  | R1: 16  | 66.7                    |
| R2                                                               | 0.06 (0, 1)           | R2                 | 1.15 (0, 7)           | <0.001                 | R2: 0   | R2: 18  | R2: 15  | (48.1, 82.0)            |
| <i>SUV-early</i>                                                 |                       | <i>PS-late</i>     |                       |                        |         |         |         |                         |
| R1                                                               | 0.64 (0, 10)          | R1                 | 1.45 (0, 11)          | <0.001                 | R1: 0   | R1: 20  | R1: 13  | 60.6                    |
| R2                                                               | 0.58 (0, 8)           | R2                 | 1.15 (0, 7)           | 0.02                   | R2: 1   | R2: 20  | R2: 12  | (42.1, 77.0)            |
| <i>PS-early</i>                                                  |                       | <i>SUV-late</i>    |                       |                        |         |         |         |                         |
| R1                                                               | 0.24 (0, 2)           | R1                 | 2.42 (0, 25)          | <0.001                 | R1: 0   | R1: 16  | R1: 17  | 72.7                    |
| R2                                                               | 0.06 (0, 1)           | R2                 | 1.42 (0, 8)           | <0.001                 | R2: 1   | R2: 15  | R2: 17  | (57.5, 87.9)            |
| <b>DOTATATE only: scale of 1-4 (1 = worst; 4 = best)</b>         |                       |                    |                       |                        |         |         |         |                         |
| <i>SUV-early</i>                                                 |                       | <i>PS-early</i>    |                       |                        |         |         |         |                         |
| R1                                                               | 1.25 (0, 5)           | R1                 | 0.25 (0, 1)           | N/A                    | R1: 3   | R1: 5   | R1: 0   | 50.0                    |
| R2                                                               | 0.75 (0, 3)           | R2                 | 0.38 (0, 3)           | N/A                    | R2: 1   | R2: 7   | R2: 0   | (15.7, 84.3)            |
| <i>SUV-late</i>                                                  |                       | <i>PS-late</i>     |                       |                        |         |         |         |                         |
| R1                                                               | 1.00 (0, 7)           | R1                 | 1.13 (0, 6)           | N/A                    | R1: 2   | R1: 3   | R1: 3   | 37.5                    |
| R2                                                               | 0.00 (0, 0)           | R2                 | 0.75 (0, 3)           | N/A                    | R2: 0   | R2: 6   | R2: 2   | (8.5, 75.5)             |
| <i>SUV-early</i>                                                 |                       | <i>SUV-late</i>    |                       |                        |         |         |         |                         |
| R1                                                               | 1.25 (0, 5)           | R1                 | 1.00 (0, 7)           | N/A                    | R1: 4   | R1: 3   | R1: 1   | 37.5                    |
| R2                                                               | 0.75 (0, 3)           | R2                 | 0.00 (0, 0)           | N/A                    | R2: 2   | R2: 6   | R2: 0   | (8.5, 75.5)             |
| <i>PS-early</i>                                                  |                       | <i>PS-late</i>     |                       |                        |         |         |         |                         |
| R1                                                               | 0.25 (0, 1)           | R1                 | 1.13 (0, 6)           | N/A                    | R1: 0   | R1: 6   | R1: 2   | 62.5                    |
| R2                                                               | 0.38 (0, 3)           | R2                 | 0.75 (0, 3)           | N/A                    | R2: 0   | R2: 7   | R2: 1   | (24.5, 91.5)            |
| <i>SUV-early</i>                                                 |                       | <i>PS-late</i>     |                       |                        |         |         |         |                         |
| R1                                                               | 1.25 (0, 5)           | R1                 | 1.13 (0, 6)           | N/A                    | R1: 1   | R1: 6   | R1: 1   | 75.0                    |
| R2                                                               | 0.75 (0, 3)           | R2                 | 0.75 (0, 3)           | N/A                    | R2: 0   | R2: 8   | R2: 0   | (34.9, 96.8)            |
| <i>PS-early</i>                                                  |                       | <i>SUV-late</i>    |                       |                        |         |         |         |                         |
| R1                                                               | 0.25 (0, 1)           | R1                 | 1.00 (0, 7)           | N/A                    | R1: 2   | R1: 4   | R1: 2   | 37.5                    |
| R2                                                               | 0.38 (0, 3)           | R2                 | 0.00 (0, 0)           | N/A                    | R2: 1   | R2: 7   | R2: 0   | (8.5, 75.5)             |

**Abbreviations:** Max = maximum; Min = minimum; R1 = reader 1; R2 = reader 2

\* Insufficient *n* for precise *P* value calculation but still possible to determine statistical significance

N/A = insufficient cases with different values for V1 and V2 to calculate a *P* value

**Note.** – The V1 > V2, V1 = V2, and V1 < V2 columns indicate the number of case in which each reader assigned higher, equal, and lower scores to variable 1 relative to variable 2, respectively.
